# Supplementary material for: Differential Regulation of Cyclin E by Yorkie-Scalloped Signaling in Organ Development
Source: Oxford University Press journal article supplement (doi:10.1534/g3.117.039065), 2017-02-01

**Figure S1**

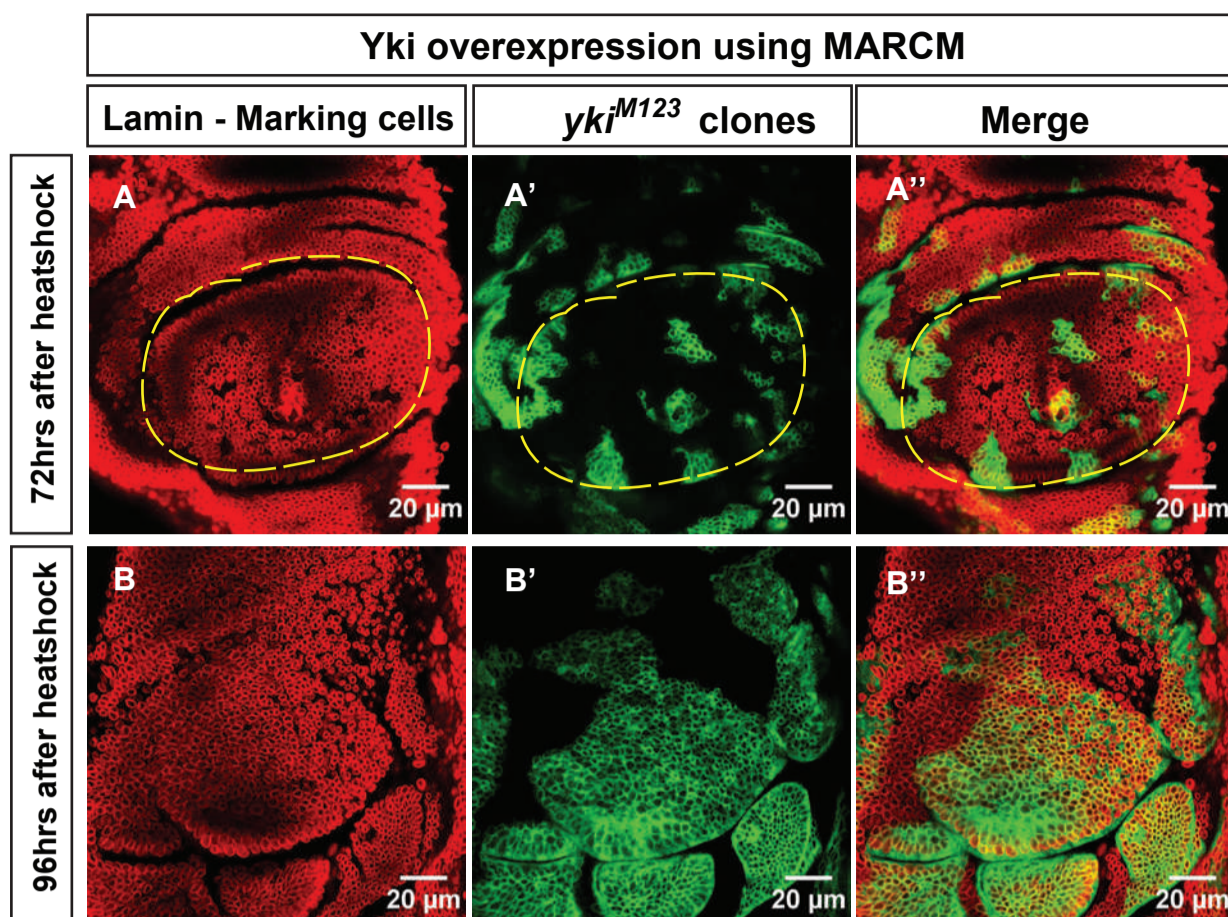

**Figure S2**

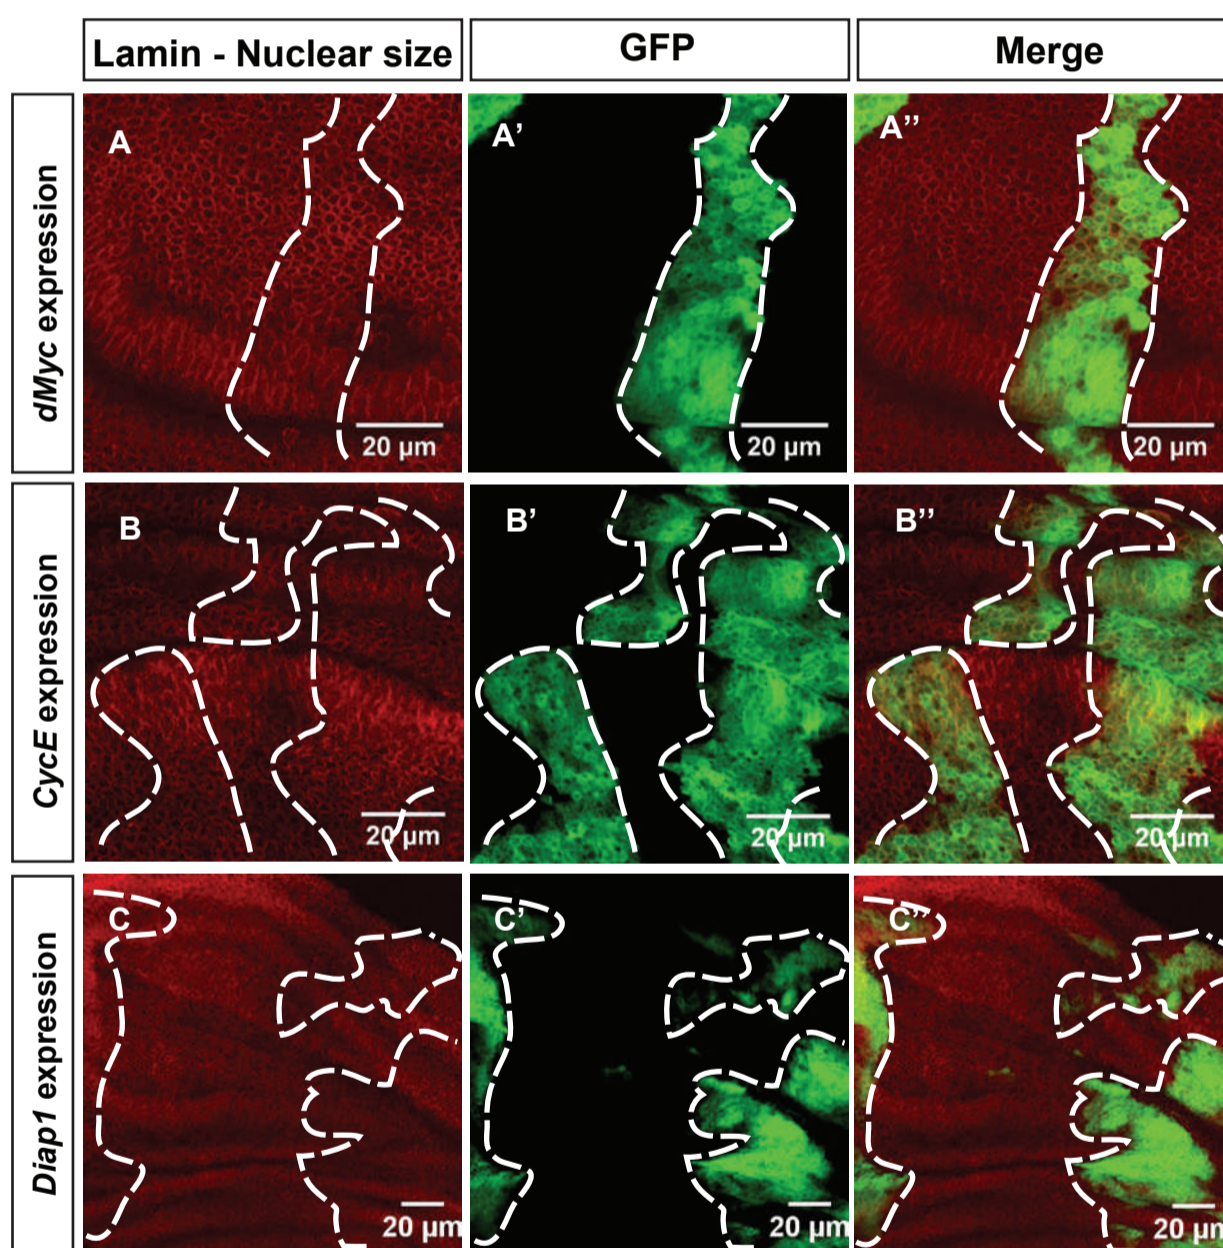

**Table S1**

Binding events of Sd on *CycE* sequence and 16.4 kb 5' *CycE* regulatory sequence

| Transcription Factors | Chromosome | Peak Start | Peak End | Putative Target Genes |
|-----------------------|------------|------------|----------|-----------------------|
| Sd                    | 2L         | 15742935   | 15745542 | FBgn0010382           |
|                       | 2L         | 15745543   | 15746281 | FBgn0010382           |
|                       | 2L         | 15746282   | 15746468 | FBgn0010382           |
|                       | 2L         | 15746543   | 15747159 | FBgn0010382           |
|                       | 2L         | 15747160   | 15747546 | FBgn0010382           |
|                       | 2L         | 15747909   | 15748183 | FBgn0010382           |
|                       | 2L         | 15762150   | 15762826 | FBgn0001987           |
| Hth                   | 2L         | 15743536   | 15744084 | FBgn0010382           |
|                       | 2L         | 15746653   | 15747159 | FBgn0010382           |
|                       | 2L         | 15747160   | 15747707 | FBgn0010382           |
|                       | 2L         | 15747947   | 15748221 | FBgn0010382           |

Note:

*CycE* sequence and 16.4 kb of the 5' *CycE* regulatory sequence: 15727581 - 15764550

FBgn0010382: *Cyclin E*

**Figure S3**

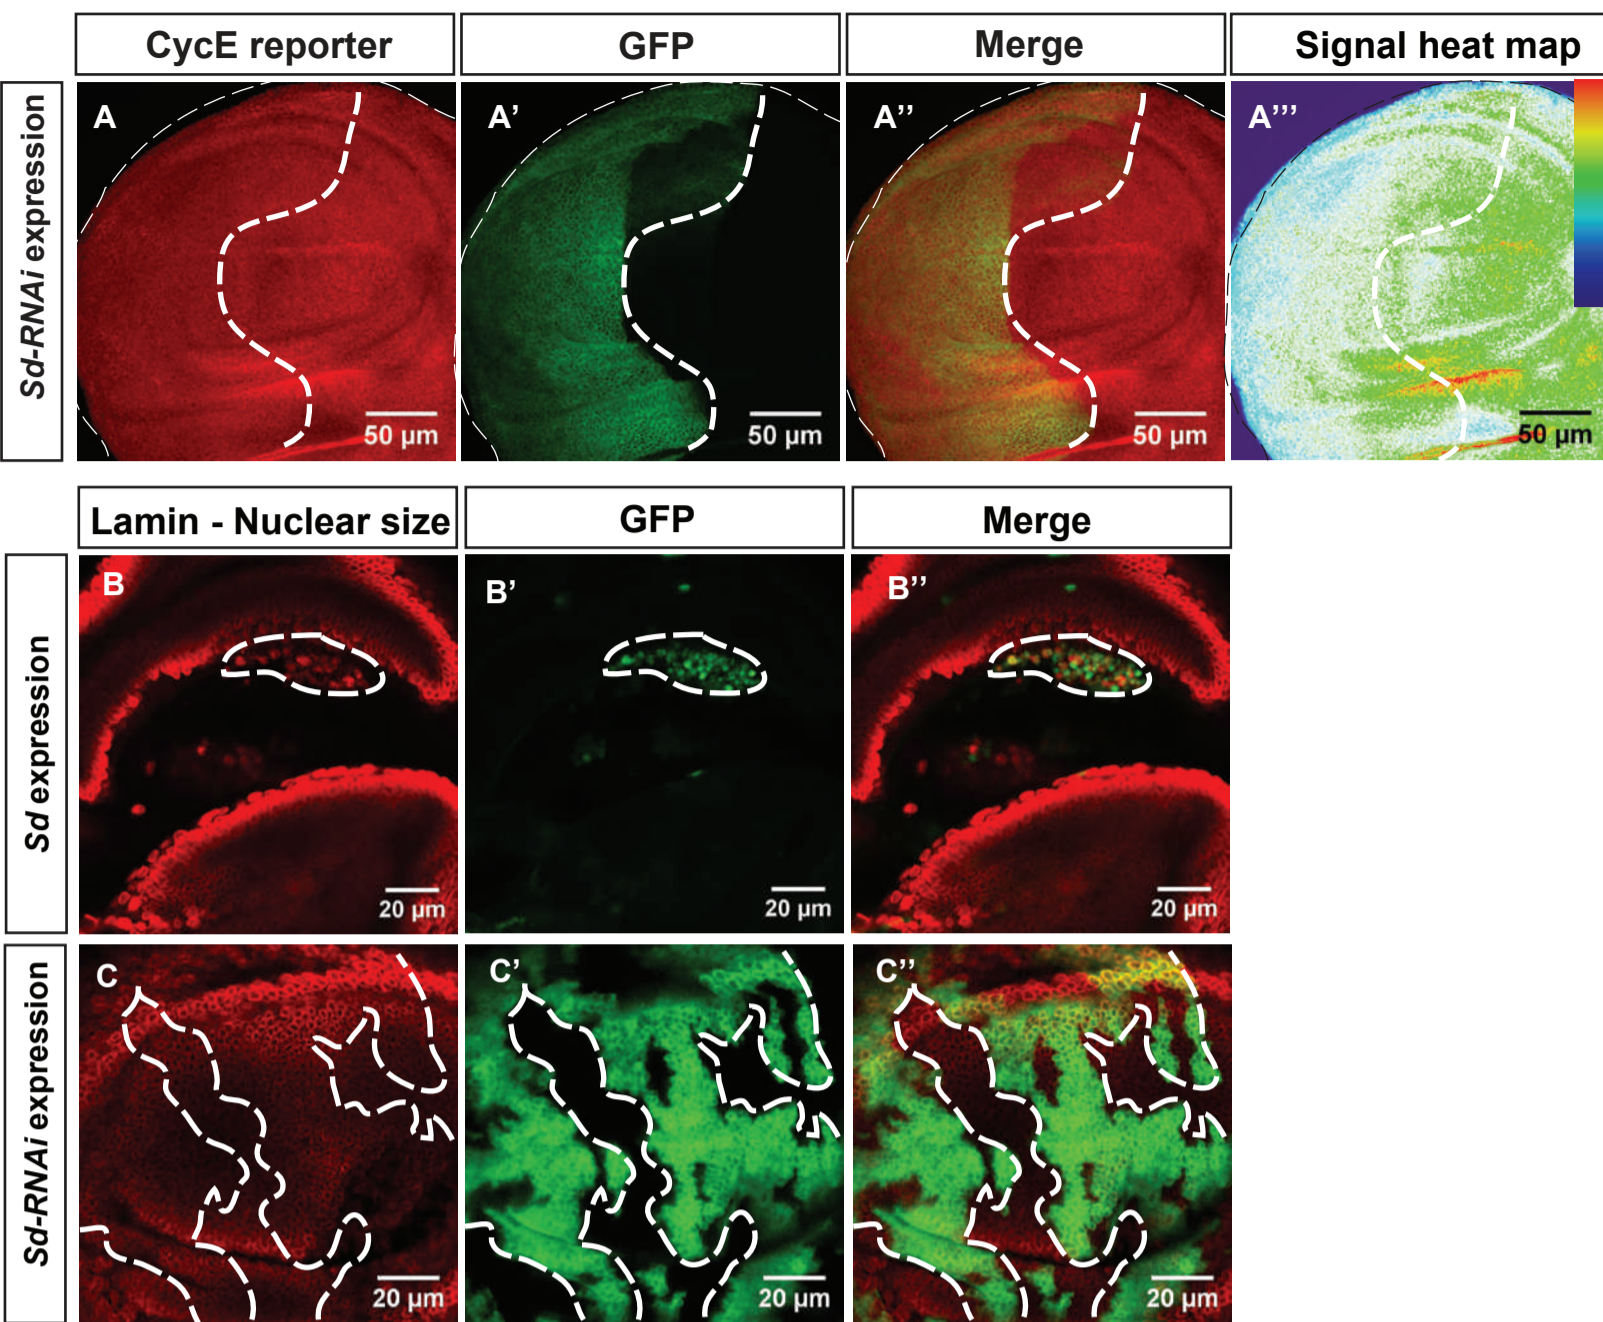

**Figure S4**

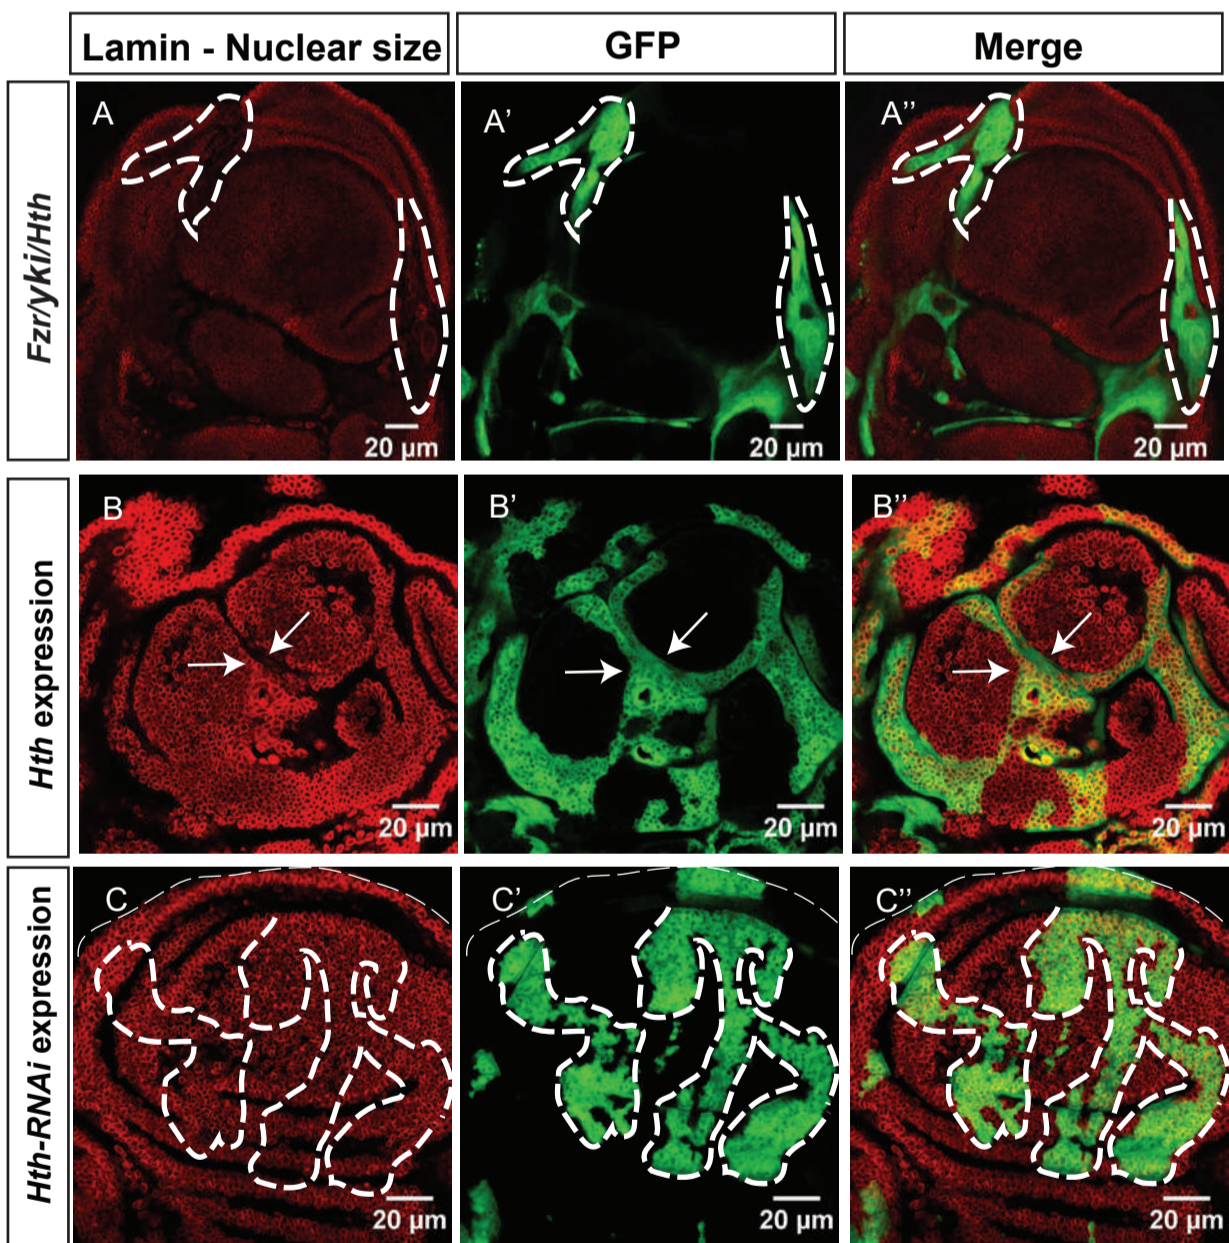

D

**Fzr, Yki, and Hth genetic experiments**

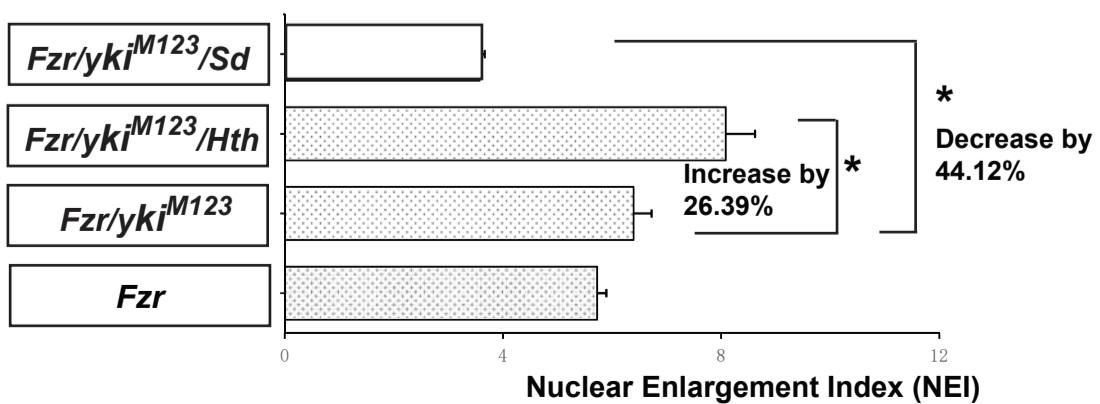

Key: Hth results Sd results Transgene Nuclear size marker \* Significant difference

**Figure S5**

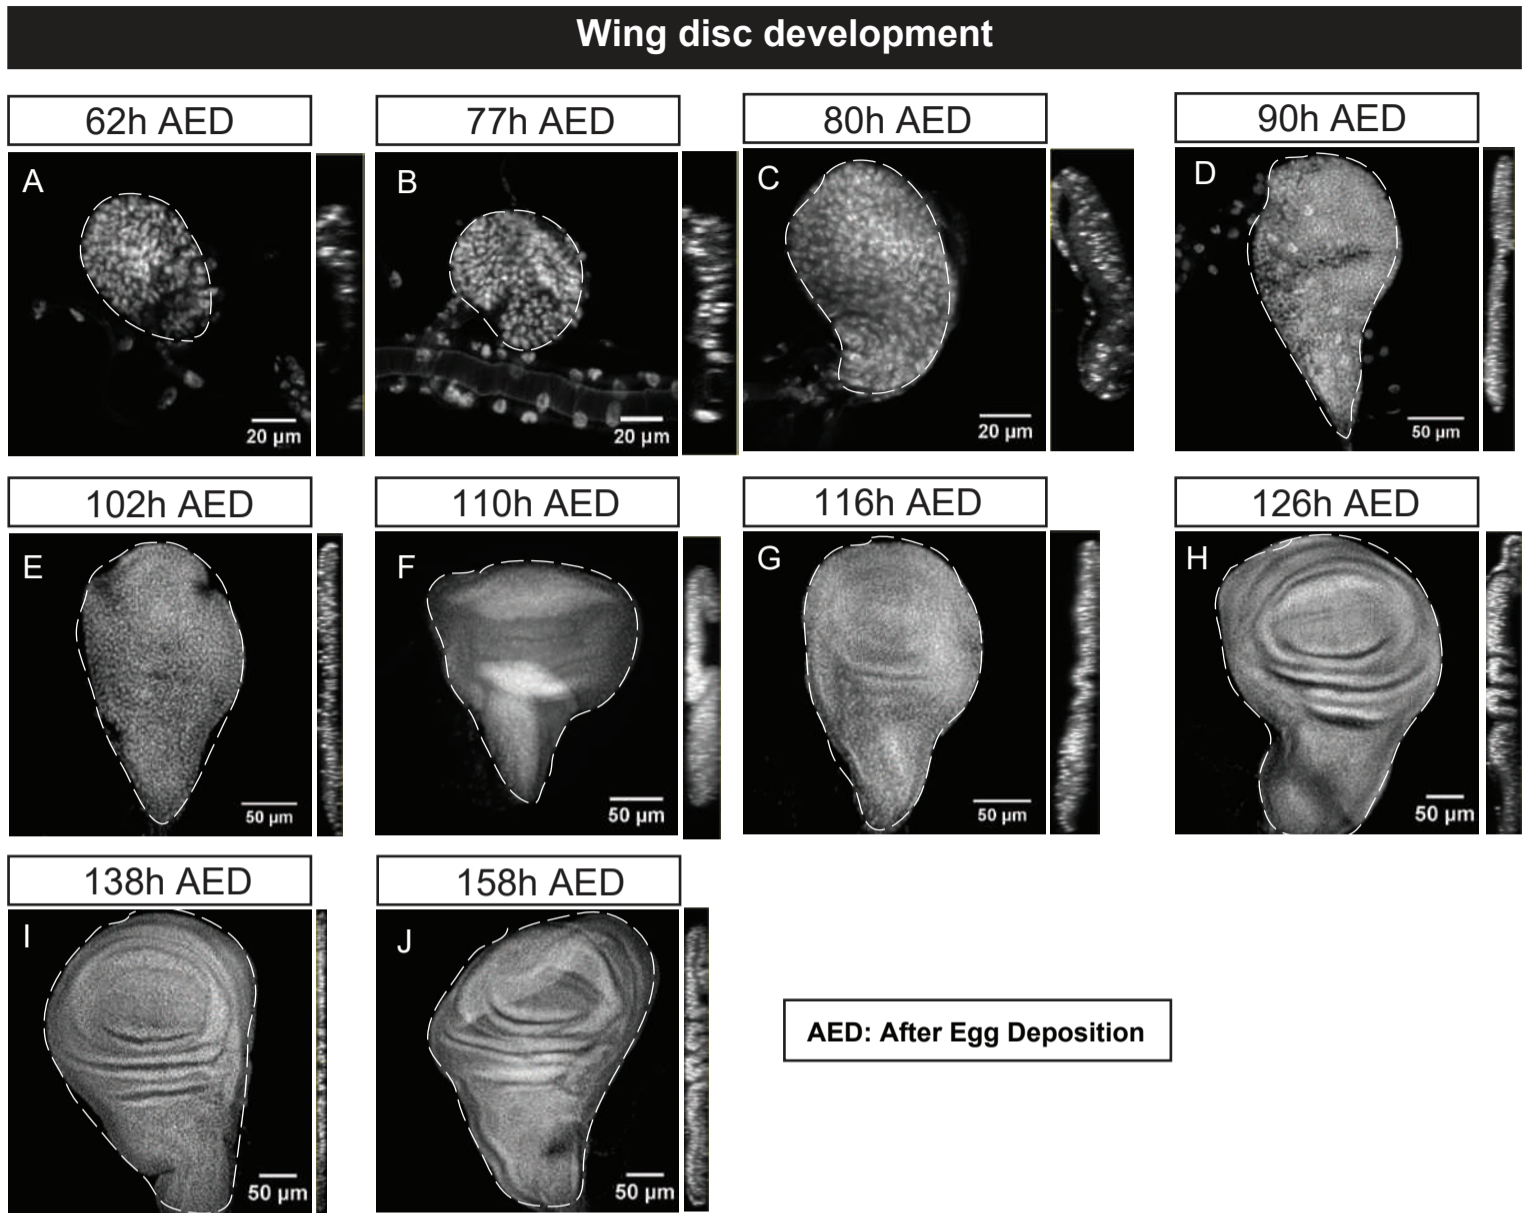

**Figure S6**

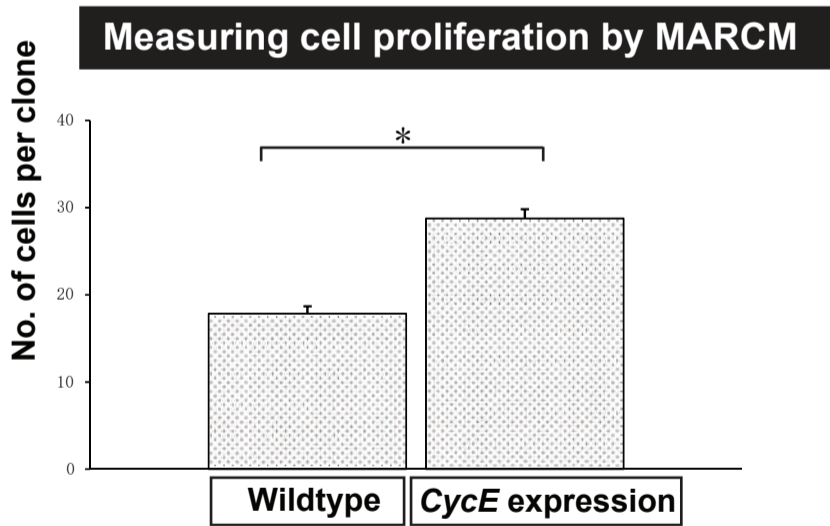

**Figure S7**

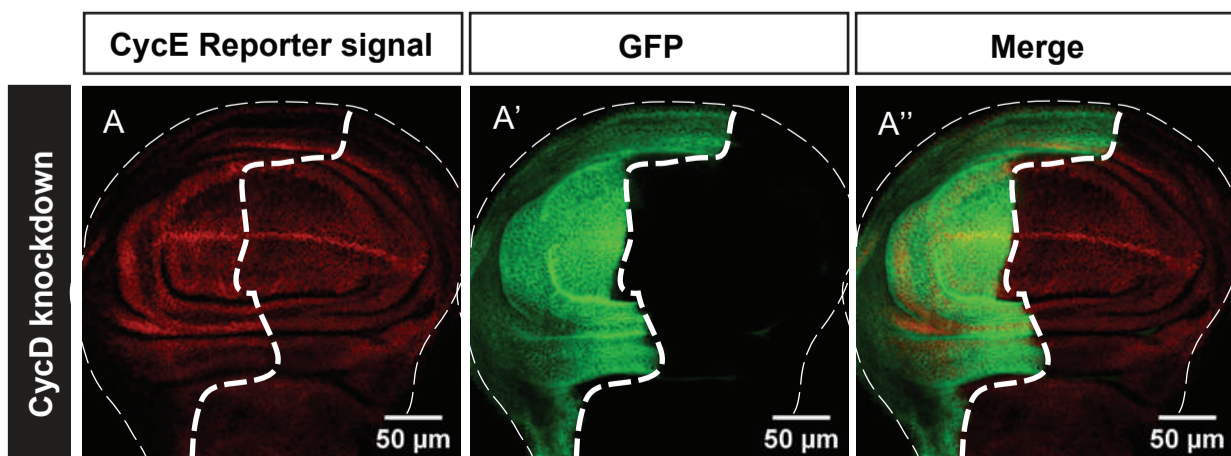

**Figure S8**

**Eye disc experiments**

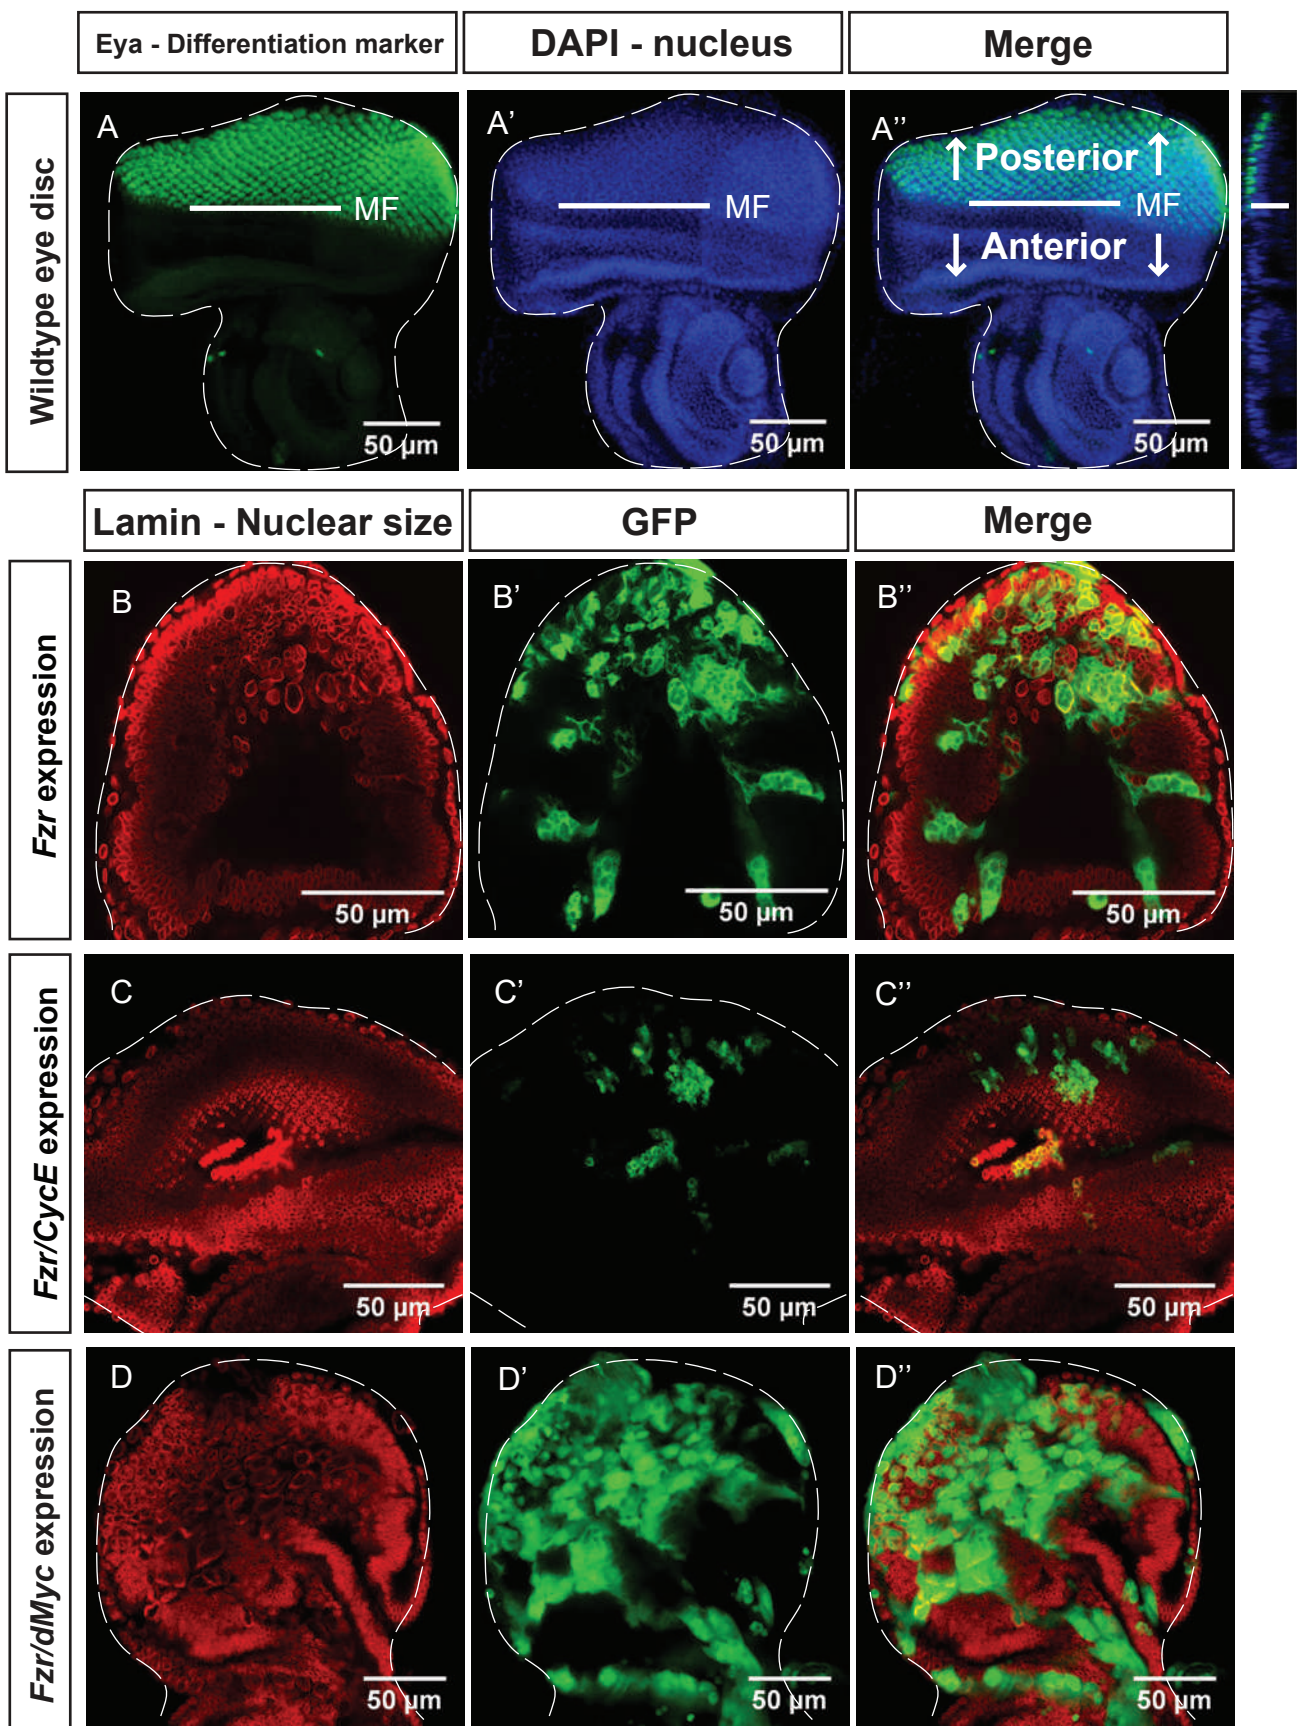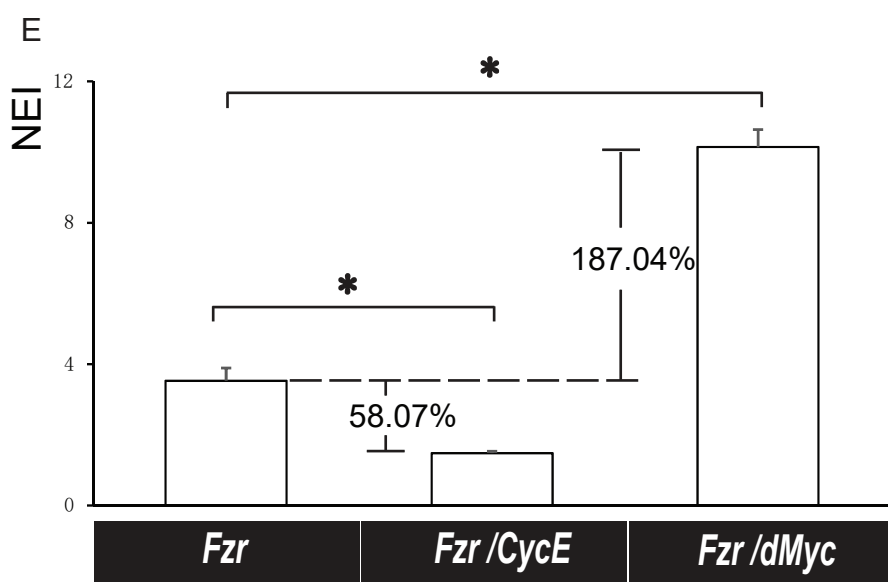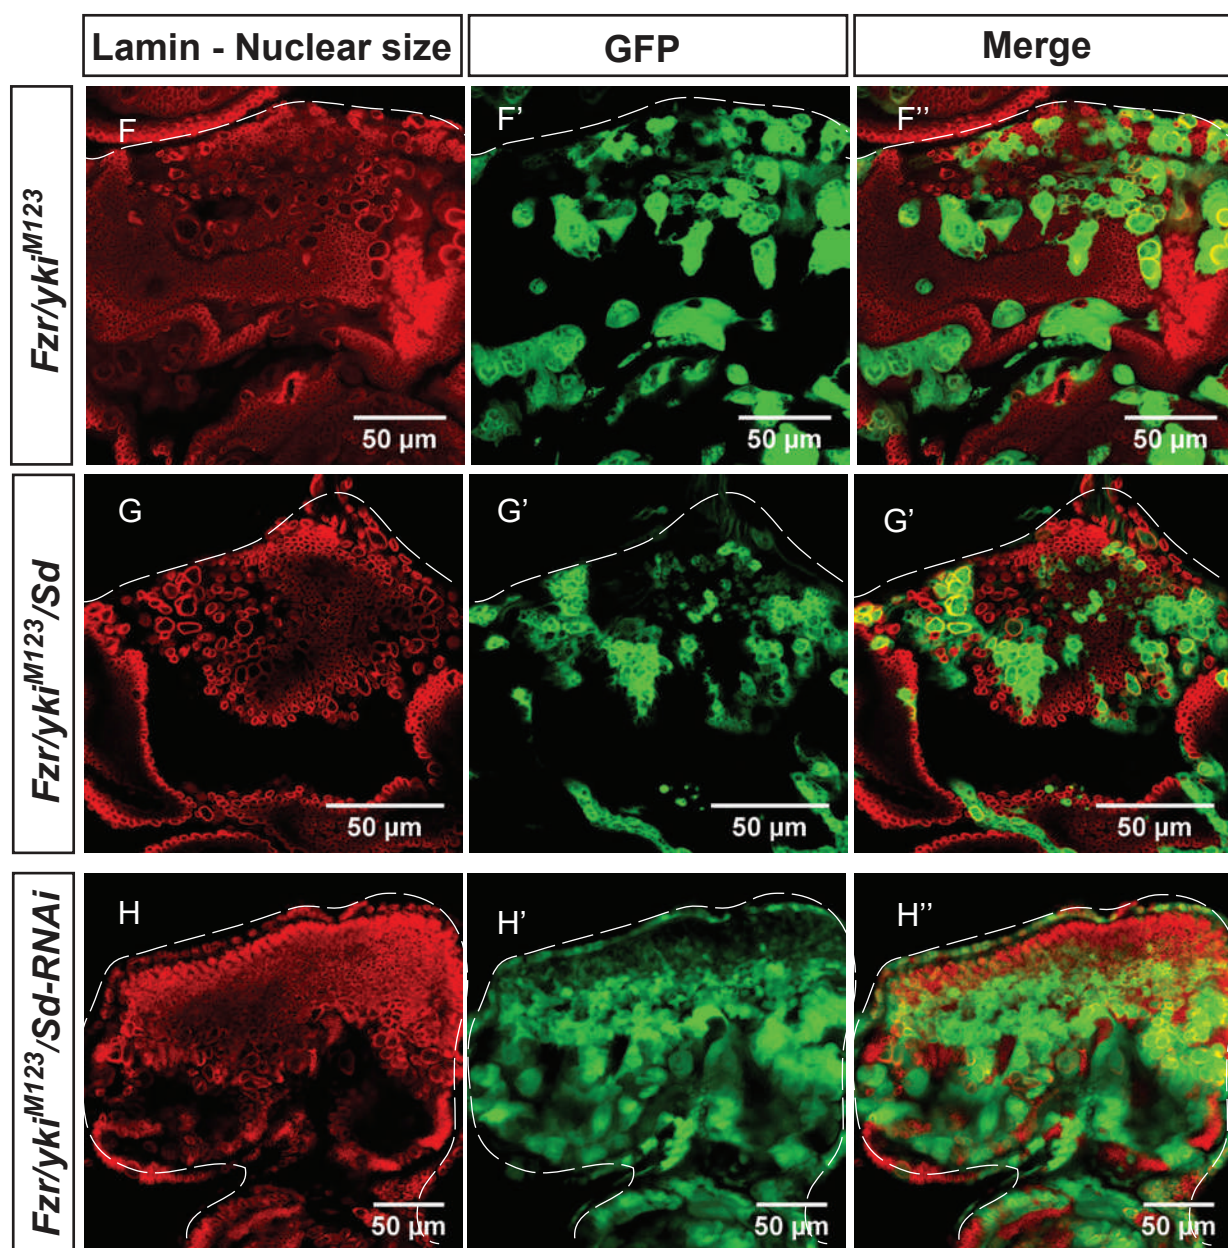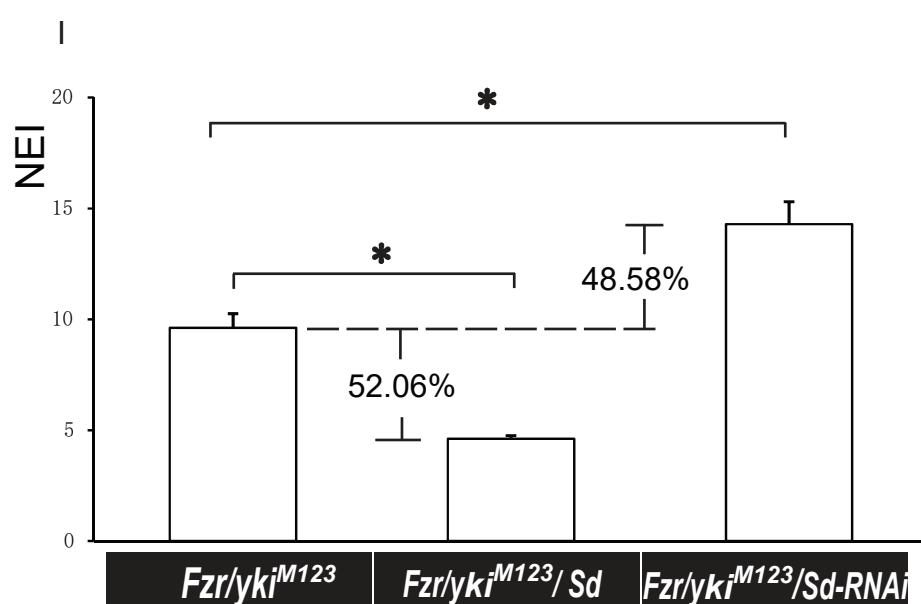

Supplement: 039065_files1.pdf [file 039065_files1.pdf]
